# Supplementary material for: Nanopore sequencing and assembly of a human genome with ultra-long reads
Source: PubMed Central journal article supplement (PMC5889714; doi:10.1038/nbt.4060), 2018-01-29
Supplement: 41587_2018_BFnbt4060_MOESM34_ESM.pdf [file 41587_2018_BFnbt4060_MOESM34_ESM.pdf]

## Supplementary Tables

### Supplementary Table 1 - Summary sequencing statistics

Summary statistics for every flowcell used in this study.

| Flowcell ID | Number of Reads | Bases Sequenced | Date     | Centre  | Sample Type | Kit      | Pore |
|-------------|-----------------|-----------------|----------|---------|-------------|----------|------|
| FAB23716    | 356209          | 1409812422      | 14/07/16 | UBC     | DNA         | Rapid    | R9   |
| FAB39088    | 658224          | 3287994454      | 19/09/16 | Notts   | DNA         | Ligation | R9.4 |
| FAB39075    | 466329          | 2439355478      | 20/09/16 | UBC     | DNA         | Ligation | R9.4 |
| FAB39043    | 436976          | 2273008592      | 23/09/16 | Bham    | DNA         | Ligation | R9.4 |
| FAB42706    | 430660          | 1966505502      | 12/10/16 | UBC     | DNA         | Ligation | R9.4 |
| FAB41174    | 117057          | 687394987       | 13/10/16 | Bham    | DNA         | Ligation | R9.4 |
| FAB42260    | 267644          | 1399557161      | 13/10/16 | UBC     | DNA         | Ligation | R9.4 |
| FAB42316    | 572838          | 3275026637      | 14/10/16 | Notts   | DNA         | Ligation | R9.4 |
| FAB42205    | 317654          | 1686630108      | 14/10/16 | Notts   | DNA         | Ligation | R9.4 |
| FAB42804    | 16669           | 75062609        | 14/10/16 | Bham    | DNA         | Ligation | R9.4 |
| FAB42561    | 233678          | 1520513556      | 19/10/16 | Notts   | DNA         | Ligation | R9.4 |
| FAB42473    | 644869          | 3357548938      | 19/10/16 | UBC     | DNA         | Ligation | R9.4 |
| FAB42395    | 38291           | 179704035       | 20/10/16 | Norwich | DNA         | Ligation | R9.4 |
| FAB42476    | 435158          | 2363036522      | 27/10/16 | UBC     | DNA         | Ligation | R9.4 |
| FAB42451    | 817629          | 4530477841      | 28/10/16 | Notts   | DNA         | Ligation | R9.4 |
| FAB42704    | 276152          | 1750149482      | 28/10/16 | UBC     | DNA         | Ligation | R9.4 |
| FAB42828    | 33527           | 163405138       | 01/11/16 | Norwich | DNA         | Ligation | R9.4 |
| FAB42810    | 322058          | 2020615256      | 02/11/16 | Norwich | DNA         | Ligation | R9.4 |
| FAB42798    | 193551          | 1339441522      | 03/11/16 | Norwich | DNA         | Ligation | R9.4 |
| FAB45280    | 128234          | 799554798       | 11/11/16 | Norwich | DNA         | Ligation | R9.4 |
| FAB46664    | 491346          | 2038018797      | 15/11/16 | UBC     | DNA         | Ligation | R9.4 |
| FAB46683    | 72605           | 286275511       | 17/11/16 | Bham    | DNA         | Ligation | R9.4 |
| FAB45332    | 530938          | 2864140853      | 17/11/16 | UBC     | DNA         | Ligation | R9.4 |
| FAB44989    | 558224          | 3443824633      | 18/11/16 | UCSC    | DNA         | Ligation | R9.4 |

|          |        |            |          |       |       |            |      |
|----------|--------|------------|----------|-------|-------|------------|------|
| FAB43577 | 426941 | 2539015084 | 18/11/16 | UCSC  | DNA   | Ligation   | R9.4 |
| FAB45321 | 299174 | 2584017112 | 22/11/16 | Notts | Cells | Ligation   | R9.4 |
| FAF01441 | 254705 | 2203636947 | 22/11/16 | Bham  | Cells | Ligation   | R9.4 |
| FAF01169 | 339447 | 2913892142 | 22/11/16 | Bham  | Cells | Ligation   | R9.4 |
| FAB45277 | 53547  | 445641679  | 22/11/16 | Notts | Cells | Ligation   | R9.4 |
| FAF01127 | 632728 | 4972081712 | 25/11/16 | Bham  | Cells | Ligation   | R9.4 |
| FAF01132 | 689781 | 5455971336 | 25/11/16 | Bham  | Cells | Ligation   | R9.4 |
| FAB45271 | 472656 | 3689043164 | 28/11/16 | Notts | Cells | Ligation   | R9.4 |
| FAB45321 | 123037 | 1043504055 | 28/11/16 | Notts | Cells | Ligation   | R9.4 |
| FAB49914 | 309175 | 2841008085 | 28/11/16 | Notts | Cells | Ligation   | R9.4 |
| FAB49712 | 632158 | 4906148911 | 28/11/16 | Bham  | Cells | Ligation   | R9.4 |
| FAF01253 | 471698 | 3695661984 | 28/11/16 | Bham  | Cells | Ligation   | R9.4 |
| FAB49164 | 746333 | 4438258089 | 06/12/16 | UCSC  | DNA   | Ligation   | R9.4 |
| FAF04090 | 91304  | 1213584440 | 09/12/16 | Bham  | Cells | Rapid      | R9.4 |
| FAB49908 | 224380 | 3141600861 | 09/12/16 | Bham  | Cells | Rapid      | R9.4 |
| FAF15665 | 82138  | 1806857522 | 10/03/17 | Notts | Cells | Ultrareads | R9.4 |
| FAF13748 | 53723  | 1252868852 | 10/03/17 | Notts | Cells | Ultrareads | R9.4 |
| FAF10039 | 41385  | 848632752  | 01/03/17 | Bham  | Cells | Ultrareads | R9.4 |
| FAF09968 | 19674  | 594496244  | 03/03/17 | Bham  | Cells | Ultrareads | R9.4 |
| FAF09277 | 73755  | 1987434656 | 03/06/17 | Bham  | Cells | Ultrareads | R9.4 |
| FAF14035 | 75692  | 1831031405 | 08/03/17 | Notts | Cells | Ultrareads | R9.4 |
| FAF15694 | 61227  | 1533616061 | 06/03/17 | Bham  | Cells | Ultrareads | R9.4 |
| FAF09713 | 65142  | 1639658993 | 07/03/17 | Bham  | Cells | Ultrareads | R9.4 |
| FAF18554 | 270189 | 2730589684 | 06/03/17 | UBC   | Cells | Rapid      | R9.4 |
| FAF15630 | 9663   | 322753214  | 09/03/17 | Notts | Cells | Ultrareads | R9.4 |
| FAF09640 | 72936  | 1496943560 | 07/03/17 | Bham  | Cells | Ultrareads | R9.4 |
| FAF09701 | 68169  | 1731054841 | 03/03/17 | Bham  | Cells | Ultrareads | R9.4 |
| FAF15586 | 71155  | 1750584936 | 08/03/17 | Bham  | Cells | Ultraread  | R9.4 |
| FAF05869 | 451020 | 3613667827 | 08/03/17 | UBC   | Cells | Ligation   | R9.4 |

**Supplementary Table 2 - Summary alignment statistics by Flowcell**  
 Summary alignment statistics (bwa mem) for each flow cell, excluding ultra-long reads.

| Flow Cell ID | Number of Sequences | Mapped Reads | Mapped MQ0 | Unmapped | Bases Mapped | Avg Length |
|--------------|---------------------|--------------|------------|----------|--------------|------------|
| FAB23716     | 356209              | 319259       | 26702      | 36950    | 1165998694   | 3957       |
| FAB39088     | 658224              | 613044       | 35394      | 45180    | 3007307322   | 4995       |
| FAB39075     | 466329              | 425117       | 28167      | 41212    | 2146453407   | 5230       |
| FAB39043     | 436976              | 415389       | 21043      | 21587    | 2113140439   | 5201       |
| FAB42706     | 430660              | 375374       | 17378      | 55286    | 1867123361   | 4566       |
| FAB41174     | 117057              | 114520       | 4186       | 2537     | 652217119    | 5872       |
| FAB42260     | 267644              | 246982       | 15624      | 20662    | 1263089767   | 5229       |
| FAB42804     | 16669               | 13311        | 1755       | 3358     | 53666089     | 4503       |
| FAB42316     | 572838              | 512994       | 18985      | 59844    | 3100596254   | 5717       |
| FAB42205     | 317654              | 282502       | 12561      | 35152    | 1601397762   | 5309       |
| FAB42561     | 233678              | 225141       | 10255      | 8537     | 1420740185   | 6506       |
| FAB42473     | 644869              | 611138       | 32539      | 33731    | 3112342902   | 5206       |
| FAB42395     | 38291               | 36477        | 2059       | 1814     | 167168840    | 4693       |
| FAB42476     | 435158              | 416969       | 20908      | 18189    | 2214880871   | 5430       |
| FAB42451     | 817629              | 779328       | 36986      | 38301    | 4178966543   | 5540       |
| FAB42704     | 276152              | 263722       | 12926      | 12430    | 1619875186   | 6337       |
| FAB42828     | 33527               | 27843        | 2442       | 5684     | 146819837    | 4873       |
| FAB42810     | 322058              | 305070       | 16802      | 16988    | 1808343119   | 6274       |
| FAB42798     | 193551              | 185739       | 8749       | 7812     | 1232035338   | 6920       |
| FAB45280     | 128234              | 122219       | 6336       | 6015     | 743280816    | 6235       |
| FAB46664     | 491346              | 456247       | 27622      | 35099    | 1862427349   | 4147       |
| FAB46683     | 72605               | 64739        | 5307       | 7866     | 269213160    | 3942       |
| FAB45332     | 530938              | 497862       | 26392      | 33076    | 2620752139   | 5394       |
| FAB43577     | 426941              | 410137       | 19835      | 16804    | 2344990054   | 5946       |
| FAB44989     | 558224              | 536572       | 25936      | 21652    | 3161900821   | 6169       |
| FAF01169     | 339447              | 315489       | 16481      | 23958    | 2677881316   | 8584       |
| FAF01441     | 254705              | 238834       | 12458      | 15871    | 2010117898   | 8651       |

|          |        |        |       |       |            |       |
|----------|--------|--------|-------|-------|------------|-------|
| FAB45277 | 53547  | 51957  | 2132  | 1590  | 426639054  | 8322  |
| FAB45321 | 299174 | 283355 | 15165 | 15819 | 2366003310 | 8637  |
| FAF01127 | 632728 | 605633 | 27192 | 27095 | 4640355789 | 7858  |
| FAF01132 | 689781 | 655357 | 33564 | 34424 | 4966810089 | 7909  |
| FAB49712 | 632158 | 612752 | 26264 | 19406 | 4594356245 | 7760  |
| FAF01253 | 471698 | 454434 | 20639 | 17264 | 3430678969 | 7834  |
| FAB45321 | 123037 | 118311 | 5891  | 4726  | 952851126  | 8481  |
| FAB49914 | 309175 | 296250 | 12281 | 12925 | 2673848960 | 9188  |
| FAB45271 | 472656 | 450702 | 20148 | 21954 | 3468377327 | 7804  |
| FAB49164 | 746333 | 718351 | 32664 | 27982 | 4107087899 | 5946  |
| FAB49908 | 224380 | 211060 | 11903 | 13320 | 2898563539 | 14001 |
| FAF04090 | 91304  | 83164  | 6072  | 8140  | 1085757398 | 13291 |

### Supplementary Table 3 - Summary alignment statistics by chromosome

(Excluding ultra-long reads)

| Chromosome | Number of Mapped Reads | Number of Mapped Reads (MQ0) | Number of Bases Mapped | Avg Length |
|------------|------------------------|------------------------------|------------------------|------------|
| Chr 1      | 1075867                | 43397                        | 6829526262             | 6744       |
| Chr 2      | 1062314                | 31802                        | 6755642896             | 6842       |
| Chr 3      | 858643                 | 24189                        | 5487703898             | 6757       |
| Chr 4      | 845677                 | 30723                        | 5395140705             | 6890       |
| Chr 5      | 774613                 | 23499                        | 4953273570             | 6821       |
| Chr 6      | 723047                 | 24496                        | 4618883250             | 6762       |
| Chr 7      | 696473                 | 28231                        | 4382999832             | 6772       |
| Chr 8      | 617988                 | 23361                        | 3968911801             | 6844       |
| Chr 9      | 539660                 | 25898                        | 3428430670             | 6764       |
| Chr 10     | 594688                 | 20787                        | 3805443564             | 6845       |
| Chr 11     | 583055                 | 17748                        | 3710684724             | 6855       |

|        |        |       |            |      |
|--------|--------|-------|------------|------|
| Chr 12 | 586663 | 17891 | 3734922623 | 6840 |
| Chr 13 | 440615 | 17662 | 2844212242 | 6904 |
| Chr 14 | 383777 | 15752 | 2439119767 | 6713 |
| Chr 15 | 359853 | 19556 | 2268233023 | 6838 |
| Chr 16 | 386401 | 22680 | 2425913744 | 6787 |
| Chr 17 | 369036 | 22907 | 2302471086 | 6661 |
| Chr 18 | 339094 | 13053 | 2172098564 | 6807 |
| Chr 19 | 257039 | 10926 | 1472760724 | 6266 |
| Chr 20 | 291960 | 13226 | 1829244829 | 6659 |
| Chr 21 | 192383 | 24988 | 1207807437 | 6792 |
| Chr 22 | 172934 | 10514 | 1041347396 | 6665 |
| Chr X  | 658347 | 28769 | 4210769167 | 7076 |
| Chr Y  | 23378  | 5292  | 133803203  | 7869 |
| Chr M  | 59363  | 658   | 91949786   | 1628 |

### Supplementary Table 4 - Read Length Metrics by DNA Input

Summary read length metrics subdivided by DNA preparation and sequencing library preparation method.

| Input DNA                                                  | Number of Reads | Median Read Length | Mean Read Length | Total Bases | Read N50 |
|------------------------------------------------------------|-----------------|--------------------|------------------|-------------|----------|
| Ligation Library, Cell DNA                                 | 4278106         | 7140               | 8123             | 34750607127 | 12112    |
| Ligation Library, Cell DNA (Albacore/ MinKNOW 1.4 Control) | 451020          | 4463               | 8012             | 3613667827  | 13920    |
| Ligation Library, Coriell DNA                              | 9233585         | 3853               | 5493             | 50724515583 | 9136     |
| Rapid Kit, Cell DNA                                        | 315684          | 6800               | 13796            | 4355185301  | 30397    |
| Rapid Kit, Cell DNA (Albacore/ MinKNOW 1.4 Control)        | 270189          | 4073               | 10106            | 2730589684  | 24848    |

|                                       |        |      |       |             |       |
|---------------------------------------|--------|------|-------|-------------|-------|
| Rapid Kit, Coriell DNA                | 356209 | 2375 | 3958  | 1409812422  | 6978  |
| Ultralong reads<br>Protocol, Cell DNA | 694659 | 3488 | 24179 | 16795933036 | 99790 |

**Supplementary Table 5** Kmer Count Summaries.

Summary containing kmer counts with respect to chromosome 20 for each of the base callers used in this study: See [Supplementary\\_Table5\\_kmer.xlsx](#)

## Supplementary Table 6 Structural Variants

Summary of structural variants observed in the Nanopore only and Nanopore polished canu assemblies.

|                    |                 | PacBio |          | Nanopore |          | Nanopore Polished |          |
|--------------------|-----------------|--------|----------|----------|----------|-------------------|----------|
| SV Type            | Size Range (bp) | Count  | Total bp | Count    | Total bp | Count             | Total bp |
| Insertion          | 50-500          | 2042   | 306272   | 3365     | 610141   | 2446              | 383069   |
|                    | 500-10000       | 319    | 618769   | 535      | 767711   | 394               | 681803   |
|                    | <b>Total:</b>   | 2361   | 925041   | 3900     | 1377852  | 2840              | 1064872  |
| Deletion           | 50-500          | 1645   | 290106   | 26853    | 4718511  | 18359             | 3358506  |
|                    | 500-10000       | 1079   | 3142086  | 1938     | 2047493  | 2438              | 2528925  |
|                    | <b>Total:</b>   | 2724   | 3432192  | 28791    | 6766004  | 20797             | 5887431  |
| Tandem expansion   | 50-500          | 1431   | 316231   | 1199     | 358827   | 1782              | 422450   |
|                    | 500-10000       | 778    | 1024584  | 1067     | 1216138  | 1068              | 1285297  |
|                    | <b>Total:</b>   | 2209   | 1340815  | 2266     | 1574965  | 2850              | 1707747  |
| Tandem contraction | 50-500          | 685    | 114672   | 629      | 96955    | 1286              | 209359   |
|                    | 500-10000       | 159    | 251549   | 75       | 158553   | 186               | 345439   |
|                    | <b>Total:</b>   | 844    | 366221   | 704      | 255508   | 1472              | 554798   |
| Repeat expansion   | 50-500          | 241    | 57575    | 1961     | 389003   | 1289              | 251816   |
|                    | 500-10000       | 373    | 894444   | 469      | 688134   | 420               | 707130   |
|                    | <b>Total:</b>   | 614    | 952019   | 2430     | 1077137  | 1709              | 958946   |



|                                 |               |       |          |       |          |       |          |
|---------------------------------|---------------|-------|----------|-------|----------|-------|----------|
| Repeat contraction              | 50-500        | 368   | 104240   | 24178 | 5467319  | 14276 | 3258222  |
|                                 | 500-10000     | 1627  | 3718349  | 6882  | 6930904  | 3129  | 2810950  |
|                                 | <b>Total:</b> | 1995  | 3822589  | 31060 | 12398223 | 17405 | 6069172  |
| <b>Totals for all variants:</b> |               | 10747 | 10838877 | 69151 | 23449689 | 47073 | 16242966 |

**Supplementary Table 7 - SRA accessions for comparative annotation.** List of SRA accessions for RNA-seq data used to guide comparative annotation process.

| <b>Project Accession</b> | <b>SRA Accessions</b>                                       | <b>Tissues</b>  |
|--------------------------|-------------------------------------------------------------|-----------------|
| PRJEB6971                | ERR579132                                                   | Ovary           |
|                          | ERR579133, ERR579135,<br>ERR579139, ERR579145               | Tonsil          |
|                          | ERR579134, ERR579136,<br>ERR579150, ERR579155               | Fallopian Tube  |
|                          | ERR579137                                                   | Placenta        |
|                          | ERR579138                                                   | Endometrium     |
|                          | ERR579140, ERR579147,<br>ERR579151                          | Rectum          |
|                          | ERR579141, ERR579142,<br>ERR579143, ERR579149,<br>ERR579151 | Skeletal Muscle |
|                          | ERR579144                                                   | Liver           |
|                          | ERR579146                                                   | Fat             |
|                          | ERR579148                                                   | Colon           |
|                          | ERR579154                                                   | Lung            |
|                          | ERR579153                                                   | Smooth Muscle   |

## Supplementary Table 8 - GraphMap Alignment Statistics

Summary alignment statistics (GraphMap) for each flow cell, including ultra-long reads.

| Flow Cell ID | Number of Sequences | Mapped Reads | Unmapped | Bases Mapped | Avg Length |
|--------------|---------------------|--------------|----------|--------------|------------|
| FAF10039     | 47446               | 23128        | 24318    | 667656276    | 28868      |
| FAF09701     | 68169               | 32100        | 36069    | 1479270745   | 46083      |
| FAF15665     | 84288               | 34226        | 50062    | 1597993761   | 46689      |
| FAF09968     | 17524               | 10188        | 7336     | 443108888    | 43493      |
| FAF09277     | 73755               | 41754        | 32001    | 1709299350   | 40937      |
| FAF15694     | 61227               | 33146        | 28081    | 1341056424   | 40459      |
| FAF09640     | 72936               | 37069        | 35867    | 1285502606   | 34679      |
| FAF09713     | 65142               | 38879        | 26263    | 1407531224   | 36203      |
| FAF15586     | 68186               | 32820        | 35366    | 1491306664   | 45439      |
| FAF15630     | 9663                | 7086         | 2577     | 282238538    | 39830      |
| FAF13748     | 53723               | 31047        | 22676    | 1099141612   | 35403      |
| FAF14035     | 75692               | 39804        | 35888    | 1503376661   | 37769      |
| FAB45271     | 472656              | 406691       | 65965    | 3314072035   | 8149       |
| FAB45321     | 299174              | 245380       | 53794    | 2249171828   | 9166       |
| FAB42316     | 572838              | 477558       | 95280    | 3058327902   | 6404       |
| FAB45280     | 128234              | 109110       | 19124    | 696764382    | 6386       |
| FAB44989     | 558224              | 482024       | 76200    | 3011499106   | 6248       |
| FAB45321     | 123037              | 103270       | 19767    | 911283560    | 8824       |
| FAB46664     | 491346              | 412952       | 78394    | 1787039440   | 4327       |
| FAB39088     | 658224              | 553407       | 104817   | 2839325410   | 5131       |
| FAB42828     | 33527               | 22135        | 11392    | 129043084    | 5830       |
| FAB42798     | 193551              | 167706       | 25845    | 1180440415   | 7039       |
| FAB42810     | 322058              | 268807       | 53251    | 1696713127   | 6312       |
| FAF01127     | 632728              | 547723       | 85005    | 4425604598   | 8080       |
| FAB42561     | 233678              | 206308       | 27370    | 1377358663   | 6676       |
| FAB42205     | 317654              | 261747       | 55907    | 1568315755   | 5992       |

|          |        |        |        |            |       |
|----------|--------|--------|--------|------------|-------|
| FAB43577 | 426941 | 370142 | 56799  | 2261278047 | 6109  |
| FAB39043 | 436976 | 382402 | 54574  | 2026829908 | 5300  |
| FAB49914 | 309175 | 266347 | 42828  | 2541235367 | 9541  |
| FAF04090 | 91304  | 65645  | 25659  | 967221027  | 14734 |
| FAB42476 | 435158 | 382131 | 53027  | 2140806786 | 5602  |
| FAF01441 | 254705 | 208108 | 46597  | 1900156923 | 9131  |
| FAB41174 | 117057 | 107747 | 9310   | 643269826  | 5970  |
| FAB49164 | 746333 | 655827 | 90506  | 3949798956 | 6023  |
| FAB42706 | 430660 | 350227 | 80433  | 1829831204 | 5225  |
| FAB42260 | 267644 | 216192 | 51452  | 1221035191 | 5648  |
| FAB42395 | 38291  | 33280  | 5011   | 160506136  | 4823  |
| FAB42473 | 644869 | 554957 | 89912  | 2990969347 | 5390  |
| FAB42451 | 817629 | 715365 | 102264 | 4022701305 | 5623  |
| FAB23716 | 356209 | 263472 | 92737  | 1071097685 | 4065  |
| FAF01169 | 339447 | 275736 | 63711  | 2539526236 | 9210  |
| FAB39075 | 466329 | 371194 | 95135  | 1989101091 | 5359  |
| FAB46683 | 72605  | 55639  | 16966  | 251376458  | 4518  |
| FAB49908 | 224380 | 177511 | 46869  | 2675201854 | 15071 |
| FAB45332 | 530938 | 451596 | 79342  | 2498402122 | 5532  |
| FAB49712 | 632158 | 557647 | 74511  | 4396917975 | 7885  |
| FAF01253 | 471698 | 409846 | 61852  | 3287940955 | 8022  |
| FAB42804 | 16669  | 8324   | 8345   | 45639694   | 5483  |
| FAF01132 | 689781 | 576530 | 113251 | 4682167262 | 8121  |
| FAB45277 | 53547  | 47344  | 6203   | 408114396  | 8620  |
| FAB42704 | 276152 | 238696 | 37456  | 1541840559 | 6459  |
| FAF05869 | 451020 | 391538 | 59482  | 3240265604 | 8276  |
| FAF18554 | 270189 | 226421 | 43768  | 2466492604 | 10893 |

## Supplementary Table 9 - Summary of HLA Typing

Genotyping was performed based on MUMmer alignments of the HLA genes and CDS nucleotides fasta files downloaded from IPD-IMGT (Methods). Gene boundaries were identified according to the gene order as in HLA haplotyping nomenclature. A haplotype was identified as the minimal edit distance to a known sequence on both a gene and exon level. For DRB1 on haplotype A, we chose the gene level haplotype with highest gene coverage and lowest edit distance. Distance measured using exon 2 and 3 for MHC class I genes and exon 2 for MHC class II genes. The G group was called by the definitions at [http://hla.alleles.org/alleles/g\\_groups.html](http://hla.alleles.org/alleles/g_groups.html). If all matches agreed on a G group, it was reported as the called type for the assembly.

| Haplotype | Haplotig            | Locus    | True HLA type (phased) | Edit distance assembly vs. truth | Edit distance called allele vs. truth |
|-----------|---------------------|----------|------------------------|----------------------------------|---------------------------------------|
| A         | tig00000001_A_pilon | HLA-A    | 01:01:01G<br>08:01:01G | 9                                | 1                                     |
|           | tig00000008_A_pilon | HLA-B    |                        | 1                                | 0                                     |
|           | tig00000008_A_pilon | HLA-C    | 07:01:01G              | 1                                | 1                                     |
|           | tig00000022_A_pilon | HLA-DQA1 | 05:01:01G              | 0                                | 0                                     |
|           | tig00000049_A_pilon | HLA-DQB1 | 02:01:01G              | 0                                | 0                                     |
|           | tig00000049_A_pilon | HLA-DRB1 | 03:01:01G              | na                               | na                                    |
| B         | tig00000003_B_pilon | HLA-A    | 11:01:01G<br>56:01:01G | 0                                | 0                                     |
|           | tig00000010_B_pilon | HLA-B    |                        | 4                                | 0                                     |

|                     |          |           |    |   |
|---------------------|----------|-----------|----|---|
| tig00000012_B_pilon | HLA-C    | 01:02:01G | 1  | 0 |
| tig00000012_B_pilon | HLA-DQA1 | 01:01:01G | 0  | 0 |
| tig00000031_B_pilon | HLA-DQB1 | 05:01:01G | 0  | 0 |
| tig00000031_B_pilon | HLA-DRB1 | 01:01:01G | 11 | 1 |

---

**Supplementary Table 10** - Summary of gap closures within the canu reference assembly and ultra-long reads from this study which span them: See Supplementary\_Table10\_gaps.xlsx.

Chromosome GRCh38 (GCA\_000001305.2) coordinates, chromosome banding information, and flanking assembled contigs are listed for each gapped region. A region is considered "closed" if it is spanned by our canu assembly and if the sequence structure observed at the assembly closure is supported by at least one 100 kb + read. The assembled contig ID from this study observed to close the gap is listed as Canu Assembly. The total number of bases inserted from the gapped region are represented as Gap size (bp). New, inserted sequences are primarily repetitive (simple sequence repeats and transposable elements), as determined by RepeatMasker. Long reads that span the gaps and provide concordant evidence for the inserted sequence in the assembly are provided. Alignments of the long reads to the assembled contigs was performed using minimap2<sup>37</sup>.

### Supplementary Table 11 - Telomere Chromosome Assignments

Characterization of telomeric repeat lengths using ultra long reads. Ultra long read alignments were determined using minimap2-2.11 (r341; [github.com/lh3/minimap2](https://github.com/lh3/minimap2)) with default parameters. Telomere repeat structure on each read was determined using HMM profile modeling of the published telomere tract of repeats M19947.1, with the total number of estimated bases listed as “Est TEL Repeat”.

| Tel | Unique Read Id                       | CHR Start | CHR End   | RD LEN | Est TEL Repeat |
|-----|--------------------------------------|-----------|-----------|--------|----------------|
| 4p  | 4a6fa80f-3ba3-4a23-92ac-02bfb2041c7d | 10248     | 261509    | 240185 | 9964           |
| 5p  | aa9292b3-abaa-4fe3-af27-e2a43d055cfd | 12465     | 173761    | 159637 | 6451           |
| 5q  | edde5135-5e84-4389-967f-e1ab09a86b52 | 181367404 | 181476277 | 109110 | 2791           |
| 9p  | ffd32c96-36aa-441e-9cc2-ab233d65e15e | 11264     | 374849    | 336855 | 1712           |
| 10p | 62e38601-5a61-430e-b047-84964d1757d2 | 10778     | 172328    | 161402 | 10520          |
| 10q | 05e99c44-b96e-4ebe-a83c-f3eed6c27a39 | 133591791 | 133786895 | 158136 | 7227           |
| 12q | e5be0ad4-173f-4a71-96df-ef7868d40938 | 133104863 | 133259321 | 151656 | 6268           |
| 16p | 29e3cce4-c451-496c-ad8c-acbca82c0947 | 10581     | 142370    | 129255 | 7297           |
| 16q | 35ac4d8b-956e-48e2-92a4-9232a9b44602 | 90066445  | 90228276  | 162410 | 7037           |
| 18p | 61f96a3b-43b8-4218-890a-eaff228aa4c9 | 10929     | 405285    | 370861 | 1573           |



|     |                                      |          |          |        |      |
|-----|--------------------------------------|----------|----------|--------|------|
| 19p | d42cbbaa-ad9e-4401-b6cc-db6eeebdb876 | 60007    | 209331   | 151977 | 8457 |
| 19q | ee33aec6-cbd2-4e3a-8401-933382c28f88 | 58255408 | 58600576 | 327135 | 5436 |
| 19q | c05710ce-b225-410d-86b1-877a130e2dc6 | 58405058 | 58605642 | 187407 | 6919 |
| 19q | 5d1474fd-e8de-49ff-8199-4f5a575e6fb8 | 58475094 | 58605641 | 130915 | 8167 |
| 21q | cc14a9c9-0d5c-4198-ac9d-04ffa4968798 | 46506906 | 46698746 | 180969 | 9108 |
| 21q | 12fc1c4d-d038-482f-bdb1-cfd172045692 | 46555114 | 46699882 | 138700 | 4939 |
